# Supplementary material for: DuBA.flow—A Low-Cost, Long-Read Amplicon Sequencing Workflow for the Validation of Synthetic DNA Constructs
Source: PubMed Central journal article supplement (PMC10877597; doi:10.1021/acssynbio.3c00522), 2024-01-31
Supplement: sb3c00522_si_001.pdf [file sb3c00522_si_001.pdf]

## Supporting Information

**Title:** DuBA.flow – A low-cost, long-read amplicon sequencing workflow for the validation of synthetic DNA constructs

**Authors:** Adán A. Ramírez Rojas<sup>1</sup>, Cedric K. Brinkmann<sup>1</sup>, Tania S. Köbel<sup>1</sup>, Daniel Schindler<sup>1,2</sup>

<sup>1</sup> Max Planck Institute for Terrestrial Microbiology, Karl-von-Frisch-Str. 10, 35043 Marburg, Germany

<sup>2</sup> Center for Synthetic Microbiology, Philipps-University Marburg, Karl-von-Frisch-Str. 14, 35032 Marburg, Germany

This file contains:

**Table S1**

**Tab. S1 | Barcoding primer sequences used in this study.** M13 forward and reverse sequences are indicated bold.

| <b>Forward barcoding primer</b> |                                                               | <b>Reverse barcoding primer</b> |                                                              |
|---------------------------------|---------------------------------------------------------------|---------------------------------|--------------------------------------------------------------|
| <b>ID</b>                       | <b>Sequence (5' -&gt;3')</b>                                  | <b>ID</b>                       | <b>Sequence (5' -&gt;3')</b>                                 |
| SLo2420                         | AAGAAAGTTGTCCGGTGTCTTTGTGCCAGTCA<br><b>CGACGTTGTAAAACG</b>    | SLo2516                         | AAGAAAGTTGTCCGGTGTCTTTGTGAGCGGATA<br><b>ACAATTTACACAGG</b>   |
| SLo2421                         | TCGATTCCGTTTGTAGTCGTCTGTCCAGTCA<br><b>CGACGTTGTAAAACG</b>     | SLo2517                         | TCGATTCCGTTTGTAGTCGTCTGTAGCGGATA<br><b>ACAATTTACACAGG</b>    |
| SLo2422                         | GAGTCTTGTGTCCCAGTTACCAGGCCAGTCA<br><b>CGACGTTGTAAAACG</b>     | SLo2518                         | GAGTCTTGTGTCCCAGTTACCAGGAGCGGATA<br><b>ACAATTTACACAGG</b>    |
| SLo2423                         | TTCGGATTCTATCGTGTTCCTACCCAGTCA<br><b>CGACGTTGTAAAACG</b>      | SLo2519                         | TTCGGATTCTATCGTGTTCCTAAGCGGATA<br><b>ACAATTTACACAGG</b>      |
| SLo2424                         | CTTGTCCAGGGTTTGTGTAACCTTCCCAGTCA<br><b>CGACGTTGTAAAACG</b>    | SLo2520                         | CTTGTCCAGGGTTTGTGTAACCTTAGCGGATA<br><b>ACAATTTACACAGG</b>    |
| SLo2425                         | TTCTCGCAAAGGCAGAAAGTAGTCCCAGTCA<br><b>CGACGTTGTAAAACG</b>     | SLo2521                         | TTCTCGCAAAGGCAGAAAGTAGCAGCGGATA<br><b>ACAATTTACACAGG</b>     |
| SLo2426                         | GTGTTACCGTGGGAATGAATCCTTCCCAGTCA<br><b>CGACGTTGTAAAACG</b>    | SLo2522                         | GTGTTACCGTGGGAATGAATCCTTAGCGGATA<br><b>ACAATTTACACAGG</b>    |
| SLo2427                         | TTCAGGGAACAAACCAAGTTACGTCCCAGTCA<br><b>CGACGTTGTAAAACG</b>    | SLo2523                         | TTCAGGGAACAAACCAAGTTACGTAGCGGATA<br><b>ACAATTTACACAGG</b>    |
| SLo2428                         | AACTAGGCACAGCGAGTCTTGTTCCCAGTCA<br><b>CGACGTTGTAAAACG</b>     | SLo2524                         | AACTAGGCACAGCGAGTCTTGTTAGCGGATA<br><b>ACAATTTACACAGG</b>     |
| SLo2429                         | AAGCGTTGAAACCTTTGTCCCTCTCCCAGTCA<br><b>CGACGTTGTAAAACG</b>    | SLo2525                         | AAGCGTTGAAACCTTTGTCCCTCAGCGGATA<br><b>ACAATTTACACAGG</b>     |
| SLo2430                         | GTTTCATCTATCGGAGGGAATGGACCCAGTCA<br><b>CGACGTTGTAAAACG</b>    | SLo2526                         | GTTTCATCTATCGGAGGGAATGGAAGCGGATA<br><b>ACAATTTACACAGG</b>    |
| SLo2431                         | CAGGTAGAAAGAAGCAGAATCGGACCCAGTCA<br><b>CGACGTTGTAAAACG</b>    | SLo2527                         | CAGGTAGAAAGAAGCAGAATCGGAAGCGGATA<br><b>ACAATTTACACAGG</b>    |
| SLo2432                         | AGAACGACTTCCATACTCGTGTGACCCAGTCA<br><b>CGACGTTGTAAAACG</b>    | SLo2528                         | AGAACGACTTCCATACTCGTGTGAGCGGATA<br><b>ACAATTTACACAGG</b>     |
| SLo2433                         | AACGAGTCTCTTGGGACCCATAGACCCAGTCA<br><b>CGACGTTGTAAAACG</b>    | SLo2529                         | AACGAGTCTCTTGGGACCCATAGAAGCGGATA<br><b>ACAATTTACACAGG</b>    |
| SLo2434                         | AGGTCTACCTCGCTAACACCACTGCCAGTCA<br><b>CGACGTTGTAAAACG</b>     | SLo2530                         | AGGTCTACCTCGCTAACACCACTGAGCGGATA<br><b>ACAATTTACACAGG</b>    |
| SLo2435                         | CGTCAACTGACAGTGGTTCGTACTIONCCCAGTCA<br><b>CGACGTTGTAAAACG</b> | SLo2531                         | CGTCAACTGACAGTGGTTCGTACTIONAGCGGATA<br><b>ACAATTTACACAGG</b> |
| SLo2436                         | ACCCCTCAGGAAAGTACCTCTGATCCCAGTCA<br><b>CGACGTTGTAAAACG</b>    | SLo2532                         | ACCCCTCAGGAAAGTACCTCTGATAGCGGATA<br><b>ACAATTTACACAGG</b>    |
| SLo2437                         | CCAAACCAACAACCTAGATAGGCCAGTCA<br><b>CGACGTTGTAAAACG</b>       | SLo2533                         | CCAAACCAACAACCTAGATAGGCAGCGGATA<br><b>ACAATTTACACAGG</b>     |
| SLo2438                         | GTTCTCGTGCAGTGTCAAGAGATCCCAGTCA<br><b>CGACGTTGTAAAACG</b>     | SLo2534                         | GTTCTCGTGCAGTGTCAAGAGATAGCGGATA<br><b>ACAATTTACACAGG</b>     |
| SLo2439                         | TTGCGTCTGTTACGAGAACTCATCCCAGTCA<br><b>CGACGTTGTAAAACG</b>     | SLo2535                         | TTGCGTCTGTTACGAGAACTCATAGCGGATA<br><b>ACAATTTACACAGG</b>     |
| SLo2440                         | GAGCCTCTCATTGTCCGTTCTCTACCCAGTCA<br><b>CGACGTTGTAAAACG</b>    | SLo2536                         | GAGCCTCTCATTGTCCGTTCTCTAAGCGGATA<br><b>ACAATTTACACAGG</b>    |
| SLo2441                         | ACCACTGCCATGTATCAAAGTACGCCAGTCA<br><b>CGACGTTGTAAAACG</b>     | SLo2537                         | ACCACTGCCATGTATCAAAGTACGAGCGGATA<br><b>ACAATTTACACAGG</b>    |
| SLo2442                         | CTTACTACCCAGTGAACCTCCTCGCCAGTCA<br><b>CGACGTTGTAAAACG</b>     | SLo2538                         | CTTACTACCCAGTGAACCTCCTCGAGCGGATA<br><b>ACAATTTACACAGG</b>    |
| SLo2443                         | GCATAGTTCTGCATGATGGGTTAGCCCAGTCA<br><b>CGACGTTGTAAAACG</b>    | SLo2539                         | GCATAGTTCTGCATGATGGGTTAGAGCGGATA<br><b>ACAATTTACACAGG</b>    |
| SLo2444                         | GTAAGTTGGGTATGCAACGCAATGCCAGTCA<br><b>CGACGTTGTAAAACG</b>     | SLo2540                         | GTAAGTTGGGTATGCAACGCAATGAGCGGATA<br><b>ACAATTTACACAGG</b>    |
| SLo2445                         | CATACAGCGACTACGCATTCTCATCCCAGTCA<br><b>CGACGTTGTAAAACG</b>    | SLo2541                         | CATACAGCGACTACGCATTCTCATAGCGGATA<br><b>ACAATTTACACAGG</b>    |
| SLo2446                         | CGACGTTAGATTACCTCTTACACCCAGTCA<br><b>CGACGTTGTAAAACG</b>      | SLo2542                         | CGACGTTAGATTACCTCTTACAAGCGGATA<br><b>ACAATTTACACAGG</b>      |
| SLo2447                         | TGAAACCTAAGAAGGCACCGTATCCCAGTCA<br><b>CGACGTTGTAAAACG</b>     | SLo2543                         | TGAAACCTAAGAAGGCACCGTATAGCGGATA<br><b>ACAATTTACACAGG</b>     |

| <b>Forward barcoding primer</b> |                                                      | <b>Reverse barcoding primer</b> |                                                     |
|---------------------------------|------------------------------------------------------|---------------------------------|-----------------------------------------------------|
| <b>ID</b>                       | <b>Sequence (5'→3')</b>                              | <b>ID</b>                       | <b>Sequence (5'→3')</b>                             |
| SLo2448                         | CTAGACACCTTGGGTTGACAGACCCCCAGTCA<br>CGACGTTGTAAAACG  | SLo2544                         | CTAGACACCTTGGGTTGACAGACCAGCGGATA<br>ACAATTTACACAGG  |
| SLo2449                         | TCAGTGAGGATCTACTTCGACCCACCCAGTCA<br>CGACGTTGTAAAACG  | SLo2545                         | TCAGTGAGGATCTACTTCGACCCAAGCGGATA<br>ACAATTTACACAGG  |
| SLo2450                         | TGCGTACAGCAATCAGTTACATTGCCAGTCA<br>CGACGTTGTAAAACG   | SLo2546                         | TGCGTACAGCAATCAGTTACATTGAGCGGATA<br>ACAATTTACACAGG  |
| SLo2451                         | CCAGTAGAAGTCCGACAACGTCATCCCAGTCA<br>CGACGTTGTAAAACG  | SLo2547                         | CCAGTAGAAGTCCGACAACGTCATAGCGGATA<br>ACAATTTACACAGG  |
| SLo2452                         | CAGACTTGGTACGGTTGGGTAACCTCCCAGTCA<br>CGACGTTGTAAAACG | SLo2548                         | CAGACTTGGTACGGTTGGGTAACCTAGCGGATA<br>ACAATTTACACAGG |
| SLo2453                         | GGACGAGAAGTCAAGTCAAAGGCCAGTCA<br>CGACGTTGTAAAACG     | SLo2549                         | GGACGAGAAGTCAAGTCAAAGGCCAGCGGATA<br>ACAATTTACACAGG  |
| SLo2454                         | CTACTTACGAAGCTGAGGGACTGCCAGTCA<br>CGACGTTGTAAAACG    | SLo2550                         | CTACTTACGAAGCTGAGGGACTGCAGCGGATA<br>ACAATTTACACAGG  |
| SLo2455                         | ATGTCCAGTTAGAGGAGGAAACACCCAGTCA<br>CGACGTTGTAAAACG   | SLo2551                         | ATGTCCAGTTAGAGGAGGAAACAAGCGGATA<br>ACAATTTACACAGG   |
| SLo2456                         | GCTTGCATTGATGCTTAGTATCACCCAGTCA<br>CGACGTTGTAAAACG   | SLo2552                         | GCTTGCATTGATGCTTAGTATCAAGCGGATA<br>ACAATTTACACAGG   |
| SLo2457                         | ACCACAGGAGGACGATACAGAGAACCAGTCA<br>CGACGTTGTAAAACG   | SLo2553                         | ACCACAGGAGGACGATACAGAGAAGCGGATA<br>ACAATTTACACAGG   |
| SLo2458                         | CCACAGTGTCAACTAGAGCCTCTCCCAGTCA<br>CGACGTTGTAAAACG   | SLo2554                         | CCACAGTGTCAACTAGAGCCTCTCAGCGGATA<br>ACAATTTACACAGG  |
| SLo2459                         | TAGTTTGGATGACCAAGGATAGCCCCAGTCA<br>CGACGTTGTAAAACG   | SLo2555                         | TAGTTTGGATGACCAAGGATAGCCAGCGGATA<br>ACAATTTACACAGG  |
| SLo2460                         | GGAGTTCGTCCAGAGAAGTACACGCCAGTCA<br>CGACGTTGTAAAACG   | SLo2556                         | GGAGTTCGTCCAGAGAAGTACACGAGCGGATA<br>ACAATTTACACAGG  |
| SLo2461                         | CTACGTGTAAGGCATACCTGCCAGCCAGTCA<br>CGACGTTGTAAAACG   | SLo2557                         | CTACGTGTAAGGCATACCTGCCAGAGCGGATA<br>ACAATTTACACAGG  |
| SLo2462                         | CTTTCGTTGTTGACTCGACGGTAGCCAGTCA<br>CGACGTTGTAAAACG   | SLo2558                         | CTTTCGTTGTTGACTCGACGGTAGAGCGGATA<br>ACAATTTACACAGG  |
| SLo2463                         | AGTAGAAAGGGTTCCTTCCCAGTCA<br>CGACGTTGTAAAACG         | SLo2559                         | AGTAGAAAGGGTTCCTTCCCAGCGGATA<br>ACAATTTACACAGG      |
| SLo2464                         | GATCCAACAGAGATGCCTTCAGTGCCAGTCA<br>CGACGTTGTAAAACG   | SLo2560                         | GATCCAACAGAGATGCCTTCAGTGAGCGGATA<br>ACAATTTACACAGG  |
| SLo2465                         | GCTGTGTTCCACTTCATTCTCCTGCCAGTCA<br>CGACGTTGTAAAACG   | SLo2561                         | GCTGTGTTCCACTTCATTCTCCTGAGCGGATA<br>ACAATTTACACAGG  |
| SLo2466                         | GTGCAACTTCCCACAGGTAGTTCCCCAGTCA<br>CGACGTTGTAAAACG   | SLo2562                         | GTGCAACTTCCCACAGGTAGTTCAGCGGATA<br>ACAATTTACACAGG   |
| SLo2467                         | CATCTGGAACGTGGTACACCTGTACCCAGTCA<br>CGACGTTGTAAAACG  | SLo2563                         | CATCTGGAACGTGGTACACCTGTAAGCGGATA<br>ACAATTTACACAGG  |
| SLo2468                         | ACTGGTGCAGCTTTGAACATCTAGCCAGTCA<br>CGACGTTGTAAAACG   | SLo2564                         | ACTGGTGCAGCTTTGAACATCTAGAGCGGATA<br>ACAATTTACACAGG  |
| SLo2469                         | ATGGACTTTGGTAACTTCTGCGTCCCAGTCA<br>CGACGTTGTAAAACG   | SLo2565                         | ATGGACTTTGGTAACTTCTGCGTAGCGGATA<br>ACAATTTACACAGG   |
| SLo2470                         | GTTGAATGAGCCTACTGGGTCTCCCAGTCA<br>CGACGTTGTAAAACG    | SLo2566                         | GTTGAATGAGCCTACTGGGTCTCAGCGGATA<br>ACAATTTACACAGG   |
| SLo2471                         | TGAGAGACAAGATTGTTGCGTGGACCCAGTCA<br>CGACGTTGTAAAACG  | SLo2567                         | TGAGAGACAAGATTGTTGCGTGGACAGCGGATA<br>ACAATTTACACAGG |
| SLo2472                         | AGATTCAGACCGTCTCATGCAAAGCCAGTCA<br>CGACGTTGTAAAACG   | SLo2568                         | AGATTCAGACCGTCTCATGCAAAGAGCGGATA<br>ACAATTTACACAGG  |
| SLo2473                         | CAAGAGCTTTGACTAAGGAGCATGCCAGTCA<br>CGACGTTGTAAAACG   | SLo2569                         | CAAGAGCTTTGACTAAGGAGCATGAGCGGATA<br>ACAATTTACACAGG  |
| SLo2474                         | TGGAAGATGAGACCTGATCTACGCCAGTCA<br>CGACGTTGTAAAACG    | SLo2570                         | TGGAAGATGAGACCTGATCTACGAGCGGATA<br>ACAATTTACACAGG   |
| SLo2475                         | TCCTACTCAACAGGTGGCATGAAACCCAGTCA<br>CGACGTTGTAAAACG  | SLo2571                         | TCCTACTCAACAGGTGGCATGAAAGCGGATA<br>ACAATTTACACAGG   |
| SLo2476                         | GCTAGGTCAATCTCCTTCGGAAGTCCCAGTCA<br>CGACGTTGTAAAACG  | SLo2572                         | GCTAGGTCAATCTCCTTCGGAAGTAGCGGATA<br>ACAATTTACACAGG  |

| Forward barcoding primer |                                                      | Reverse barcoding primer |                                                     |
|--------------------------|------------------------------------------------------|--------------------------|-----------------------------------------------------|
| ID                       | Sequence (5'→3')                                     | ID                       | Sequence (5'→3')                                    |
| SLo2477                  | CAGGTTACTCCTCCGTGAGTCTGACCCAGTCA<br>CGACGTTGTAAAACG  | SLo2573                  | CAGGTTACTCCTCCGTGAGTCTGAAGCGGATA<br>ACAATTTACACAGG  |
| SLo2478                  | TCAATCAAGAAGGGAAAGCAAGGTCCCAGTCA<br>CGACGTTGTAAAACG  | SLo2574                  | TCAATCAAGAAGGGAAAGCAAGGTAGCGGATA<br>ACAATTTACACAGG  |
| SLo2479                  | CATGTTCAACCAAGGCTTCTATGGCCCAGTCA<br>CGACGTTGTAAAACG  | SLo2575                  | CATGTTCAACCAAGGCTTCTATGGAGCGGATA<br>ACAATTTACACAGG  |
| SLo2480                  | AGAGGGTACTATGTGCCTCAGCACCCAGTCA<br>CGACGTTGTAAAACG   | SLo2576                  | AGAGGGTACTATGTGCCTCAGCACAGCGGATA<br>ACAATTTACACAGG  |
| SLo2481                  | CACCCACACTTACTTCAGGACGTACCCAGTCA<br>CGACGTTGTAAAACG  | SLo2577                  | CACCCACACTTACTTCAGGACGTAAGCGGATA<br>ACAATTTACACAGG  |
| SLo2482                  | TTCTGAAGTTCCTGGGTCTTGAACCCAGTCA<br>CGACGTTGTAAAACG   | SLo2578                  | TTCTGAAGTTCCTGGGTCTTGAACAGCGGATA<br>ACAATTTACACAGG  |
| SLo2483                  | GACAGACACCGTTCATCGACTTTCGCCAGTCA<br>CGACGTTGTAAAACG  | SLo2579                  | GACAGACACCGTTCATCGACTTTCAGCGGATA<br>ACAATTTACACAGG  |
| SLo2484                  | TTCTCAGTCTTCCTCCAGACAAGGCCAGTCA<br>CGACGTTGTAAAACG   | SLo2580                  | TTCTCAGTCTTCCTCCAGACAAGGAGCGGATA<br>ACAATTTACACAGG  |
| SLo2485                  | CCGATCCTTGTGGCTTCTAACTTCCCAGTCA<br>CGACGTTGTAAAACG   | SLo2581                  | CCGATCCTTGTGGCTTCTAACTTACGCGGATA<br>ACAATTTACACAGG  |
| SLo2486                  | GTTTGTCACTACTCGTGTGCTCACCCAGTCA<br>CGACGTTGTAAAACG   | SLo2582                  | GTTTGTCACTACTCGTGTGCTCACAGCGGATA<br>ACAATTTACACAGG  |
| SLo2487                  | GAATCTAAGCAAACACGAAGGTGGCCAGTCA<br>CGACGTTGTAAAACG   | SLo2583                  | GAATCTAAGCAAACACGAAGGTGGAGCGGATA<br>ACAATTTACACAGG  |
| SLo2488                  | TACAGTCCGAGCCTCATGTGATCTCCAGTCA<br>CGACGTTGTAAAACG   | SLo2584                  | TACAGTCCGAGCCTCATGTGATCTAGCGGATA<br>ACAATTTACACAGG  |
| SLo2489                  | ACCGAGATCCTACGAATGGAGTGTCCCAGTCA<br>CGACGTTGTAAAACG  | SLo2585                  | ACCGAGATCCTACGAATGGAGTGTAGCGGATA<br>ACAATTTACACAGG  |
| SLo2490                  | CCTGGGAGCATCAGGTAGTAACAGCCAGTCA<br>CGACGTTGTAAAACG   | SLo2586                  | CCTGGGAGCATCAGGTAGTAACAGAGCGGATA<br>ACAATTTACACAGG  |
| SLo2491                  | TAGCTGACTGTCTTCCATACCGACCCAGTCA<br>CGACGTTGTAAAACG   | SLo2587                  | TAGCTGACTGTCTTCCATACCGACAGCGGATA<br>ACAATTTACACAGG  |
| SLo2492                  | AAGAAACAGGATGACAGAACCCTCCCAGTCA<br>CGACGTTGTAAAACG   | SLo2588                  | AAGAAACAGGATGACAGAACCCTCAGCGGATA<br>ACAATTTACACAGG  |
| SLo2493                  | TACAAGCATCCCAACACTTCCACTCCCAGTCA<br>CGACGTTGTAAAACG  | SLo2589                  | TACAAGCATCCCAACACTTCCACTAGCGGATA<br>ACAATTTACACAGG  |
| SLo2494                  | GACCATTGTGATGAACCTGTTGTCCCAGTCA<br>CGACGTTGTAAAACG   | SLo2590                  | GACCATTGTGATGAACCTGTTGTAGCGGATA<br>ACAATTTACACAGG   |
| SLo2495                  | ATGCTTGTACATCAACCCTGGACCCAGTCA<br>CGACGTTGTAAAACG    | SLo2591                  | ATGCTTGTACATCAACCCTGGACAGCGGATA<br>ACAATTTACACAGG   |
| SLo2496                  | CGACCTGTTTCTCAGGGATAACAACCCAGTCA<br>CGACGTTGTAAAACG  | SLo2592                  | CGACCTGTTTCTCAGGGATAACAACAGCGGATA<br>ACAATTTACACAGG |
| SLo2497                  | AACAACCGAACCTTTGAATCAGAACCAGTCA<br>CGACGTTGTAAAACG   | SLo2593                  | AACAACCGAACCTTTGAATCAGAAAGCGGATA<br>ACAATTTACACAGG  |
| SLo2498                  | TCTCGGAGATAGTTCTCACTGCTGCCAGTCA<br>CGACGTTGTAAAACG   | SLo2594                  | TCTCGGAGATAGTTCTCACTGCTGAGCGGATA<br>ACAATTTACACAGG  |
| SLo2499                  | CGGATGAACATAGGATAGCGATTCCCAGTCA<br>CGACGTTGTAAAACG   | SLo2595                  | CGGATGAACATAGGATAGCGATTAGCGGATA<br>ACAATTTACACAGG   |
| SLo2500                  | CCTCATCTTGTGAAGTTGTTTCGGCCCAGTCA<br>CGACGTTGTAAAACG  | SLo2596                  | CCTCATCTTGTGAAGTTGTTTCGGAGCGGATA<br>ACAATTTACACAGG  |
| SLo2501                  | ACGGTATGTGCGAGTTCAGGACTACCCAGTCA<br>CGACGTTGTAAAACG  | SLo2597                  | ACGGTATGTGCGAGTTCAGGACTAAGCGGATA<br>ACAATTTACACAGG  |
| SLo2502                  | TGGCTTGATCTAGGTAAGGTGCAACCCAGTCA<br>CGACGTTGTAAAACG  | SLo2598                  | TGGCTTGATCTAGGTAAGGTGCAAGCGGATA<br>ACAATTTACACAGG   |
| SLo2503                  | GTAGTGGACCTAGAACCCTGTGCCACCCAGTCA<br>CGACGTTGTAAAACG | SLo2599                  | GTAGTGGACCTAGAACCCTGTGCCAAGCGGATA<br>ACAATTTACACAGG |
| SLo2504                  | AACGGAGGAGTTAGTTGGATGATCCCAGTCA<br>CGACGTTGTAAAACG   | SLo2600                  | AACGGAGGAGTTAGTTGGATGATAGCGGATA<br>ACAATTTACACAGG   |
| SLo2505                  | AGGTGATCCCAACAAGCGTAAGTACCCAGTCA<br>CGACGTTGTAAAACG  | SLo2601                  | AGGTGATCCCAACAAGCGTAAGTAAGCGGATA<br>ACAATTTACACAGG  |

| <b>Forward barcoding primer</b> |                                                     | <b>Reverse barcoding primer</b> |                                                    |
|---------------------------------|-----------------------------------------------------|---------------------------------|----------------------------------------------------|
| <b>ID</b>                       | <b>Sequence (5'→3')</b>                             | <b>ID</b>                       | <b>Sequence (5'→3')</b>                            |
| SLo2506                         | TACATGCTCCTGTTGTTAGGGAGGCCAGTCA<br>CGACGTTGTAAAACG  | SLo2602                         | TACATGCTCCTGTTGTTAGGGAGGAGCGGATA<br>ACAATTCACACAGG |
| SLo2507                         | TCTTCTACTACCGATCCGAAGCAGCCCAGTCA<br>CGACGTTGTAAAACG | SLo2603                         | TCTTCTACTACCGATCCGAAGCAGAGCGGATA<br>ACAATTCACACAGG |
| SLo2508                         | ACAGCATCAATGTTTGGCTAGTTGCCAGTCA<br>CGACGTTGTAAAACG  | SLo2604                         | ACAGCATCAATGTTTGGCTAGTTGAGCGGATA<br>ACAATTCACACAGG |
| SLo2509                         | GATGTAGAGGGTACGGTTTGAGGCCAGTCA<br>CGACGTTGTAAAACG   | SLo2605                         | GATGTAGAGGGTACGGTTTGAGGCAGCGGATA<br>ACAATTCACACAGG |
| SLo2510                         | GGCTCCATAGGAACTCACGCTACTCCCAGTCA<br>CGACGTTGTAAAACG | SLo2606                         | GGCTCCATAGGAACTCACGCTACTAGCGGATA<br>ACAATTCACACAGG |
| SLo2511                         | TTGTGAGTGGAAAGATACAGGACCCCAGTCA<br>CGACGTTGTAAAACG  | SLo2607                         | TTGTGAGTGGAAAGATACAGGACAGCGGATA<br>ACAATTCACACAGG  |
| SLo2512                         | AGTTTCCATCACTTCAGACTTGGGCCAGTCA<br>CGACGTTGTAAAACG  | SLo2608                         | AGTTTCCATCACTTCAGACTTGGGAGCGGATA<br>ACAATTCACACAGG |
| SLo2513                         | GATTGTCTCAAACGCCACCTACCCCAGTCA<br>CGACGTTGTAAAACG   | SLo2609                         | GATTGTCTCAAACGCCACCTACAGCGGATA<br>ACAATTCACACAGG   |
| SLo2514                         | CCTGTCTGGAAGAAGAATGGACTTCCCAGTCA<br>CGACGTTGTAAAACG | SLo2610                         | CCTGTCTGGAAGAAGAATGGACTTAGCGGATA<br>ACAATTCACACAGG |
| SLo2515                         | CTGAACGGTCATAGAGTCCACCATCCCAGTCA<br>CGACGTTGTAAAACG | SLo2611                         | CTGAACGGTCATAGAGTCCACCATAGCGGATA<br>ACAATTCACACAGG |
